# Supplementary material for: An Optical Atmospheric Phenomenon Observed in 1670 over the City of Astrakhan Was Not a Mid-Latitude Aurora
Source: Springer Nature journal article supplement (doi:10.1007/s11207-016-1035-6), 2016-12-20
Supplement: 11207_2016_1035_MOESM1_ESM.pdf [file 11207_2016_1035_MOESM1_ESM.pdf]

## Electronic Supplementary Material

to the paper

"An Optical Atmospheric Phenomenon Observed in 1670 over the City of Astrakhan Was not a Mid-Latitude Aurora" by Usoskin et al.

Генваря <sup>22</sup> в 4 день, за час до свету, || в субботный <sup>23</sup> день <sup>23</sup>, бысть трясение земли, все <sup>24</sup> хоромы потряслися <sup>25</sup> во всем граде Астрарахане <sup>26</sup>, и куры с напестей <sup>27</sup> попадали. Последи же того

Figure S1. A scan of the original text from page 208 of Buganov and Rybakov (1968). The red oval highlights mentioning of the timing discussed in the main text.

В четвертом знаменни.

Июля <sup>45</sup> в 19 день другое <sup>46</sup> бысть трясение земли <sup>47</sup>, паче и <sup>48</sup> того <sup>48</sup>, по <sup>49</sup> утру на исходе первого часа <sup>49</sup>. Боярин же князь Иван <sup>50</sup> || Семенович Прозоровской притече к преосвященному <sup>51</sup>

Figure S2. A scan of the original text from page 209 of Buganov and Rybakov (1968). The red oval highlights mentioning of the timing discussed in the main text.

О пятом видении.

Июля <sup>38</sup> в 13 день в <sup>39</sup> Кремле городе были <sup>40</sup> поставлены <sup>41</sup> на карауле в Пречистенских воротах <sup>40</sup> московские стрельцы Алексеева приказу Соловцова, которые <sup>42</sup> были оставлены от высылки для <sup>43</sup> караулов <sup>42</sup>, и за три часа до свету <sup>44</sup> видели <sup>44</sup> знамение, что <sup>45</sup> надо всю Астрараханию отворилось <sup>46</sup> небо <sup>46</sup> и просыпалось <sup>47</sup> из неба на весь град <sup>48</sup> подобно печным <sup>49</sup> искрам. И <sup>50</sup> то видение, пришед московские стрельцы с караула в соборную церковь к <sup>51</sup> преосвященному || Иосифу митрополиту, поведали <sup>52</sup>, а <sup>53</sup> в то время в соборе пели утреннюю. Митрополит же то <sup>54</sup> услыша <sup>55</sup>, и <sup>56</sup> слезен <sup>57</sup> бысть <sup>57</sup> долг час, и в <sup>58</sup> келлию пришед <sup>58</sup>, глаголаше <sup>59</sup>: «Се <sup>60</sup>, видение таково — излился с небеси фиаг гнева господня <sup>61</sup>»; и по <sup>62</sup> утру <sup>62</sup> поведает боярину и <sup>63</sup> воеводам <sup>63</sup> князю Ивану Семеновичю Прозоровскому с <sup>64</sup> товарищи <sup>64</sup>. Он же великий новый страстотерпец боярин <sup>65</sup>

Figure S3. A scan of the original text from page 211 of Buganov and Rybakov (1968). The red ovals highlight mentioning of the timing discussed in the main text.

А <sup>71</sup> на утрие <sup>71</sup>, в <sup>72</sup> 6-м часе <sup>73</sup> дня <sup>74</sup>, велели <sup>75</sup> в болшей <sup>76</sup> колокол звонить <sup>77</sup> не часто,

Figure S4. A scan of the original text from page 227 of Buganov and Rybakov (1968). The red oval highlights mentioning of the timing discussed in the main text.

въ приложеніи въ таол. LXVII. Привожу описаніе наиболѣ выдающихся оптическихъ явленій, записанныхъ въ хронику г. Астрахани: 13-го Іюня 1670 г., бывшіе ночью на караулѣ стрѣльцы, со страхомъ рассказывали, о появившемся ночью свѣтѣ надъ городомъ и о посыпавшихся изъ него искрахъ. Въ этомъ же году неоднократно наблюдались свѣтовые столбы на небѣ. 13-го Января 1848 г., въ 10<sup>1</sup>/<sub>2</sub> часовъ вечера, при восходѣ луны, видны были красные треугольники, скоро исчезнувшіе. Того же года 16-го Марта, въ 7 часовъ вечера, на SW и NE сторонахъ небосклона, наблюдались огненные столбы, въ SW части неба—два, а въ NE—три, которые, по истеченіи двухъ часовъ, мало по малу начали исчезать. 20-го Апрѣля, около 6 часовъ вечера, видны были вокругъ солнца радужнаго цвѣта круги. 30-го Мая, въ 8<sup>1</sup>/<sub>2</sub> часовъ вечера появился на небѣ свѣтящійся, бѣлаго цвѣта шаръ, который, быстро двигаясь, разсыпался искрами, оставивъ на своемъ мѣстѣ на нѣсколько секундъ яркое сіяніе, по исчезновеніи котораго видна была свѣтовая полоса въ видѣ хвоста. 7-го Декабря, въ 8 часовъ утра, по обѣимъ сторонамъ солнца

Figure S5. A scan of the original text from page 382 of Schperk (1895) related to the discussion of similar atmospheric phenomena observed in Astrakhan. The red rectangle highlights the explicit mentioning that light pillars in the sky were frequent that year (viz. in 1760).

#### Original references to Russian sources:

- R1. Reference (Buganov and Rybakov, 1968) is cited according to:  
Полное собрание русских летописей. т. 31. Летописцы последней четверти XVII в., под ред. В.И. Буганов и В.А. Рыбаков, Москва, Наука, 1968.
- R2. Reference (Kostomarov, 1994) is cited as a re-publishing of the original work:  
Костомаров, Н.И., Исторические монографии и исследования, тип. М.М. Стасюлевича, Санкт-Петербург, т.2, с. 405.505, 1903.
- R3. Reference (Schperk, 1895) is cited according to:  
Шперк, Ф.Ф., Очерки Астраханского края. Климат г. Астрахани и Астраханского края, СПб, Тип. Имп. Акад. Наук., 1895 (Записки императорского Русского географического общества по общей географии, т. 27.)
